# Supplementary material
Source: PubMed Central journal article supplement (PMC6353431)
Supplement: MDC3-4-62-s001.pdf [file MDC3-4-62-s001.pdf]

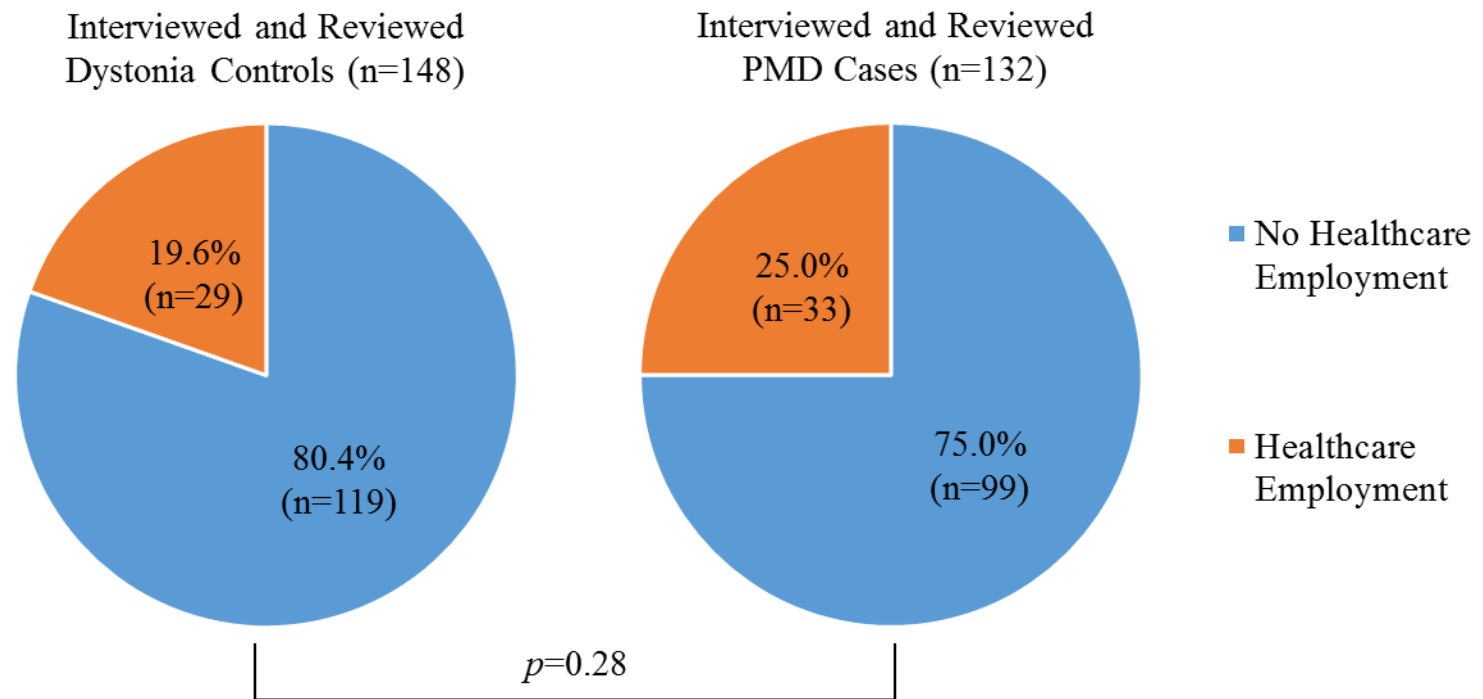

**Figure S1. Distribution of healthcare and non-healthcare workers amongst interviewed and reviewed dystonia controls and psychogenic movement disorder (PMD) cases. ( $X^2_{(df=1, n=280)}=1.18, p=0.28$ )**
