# Supplementary material
Source: PubMed Central journal article supplement (PMC6353431)
Supplement: MDC3-4-62-s002.pdf [file MDC3-4-62-s002.pdf]

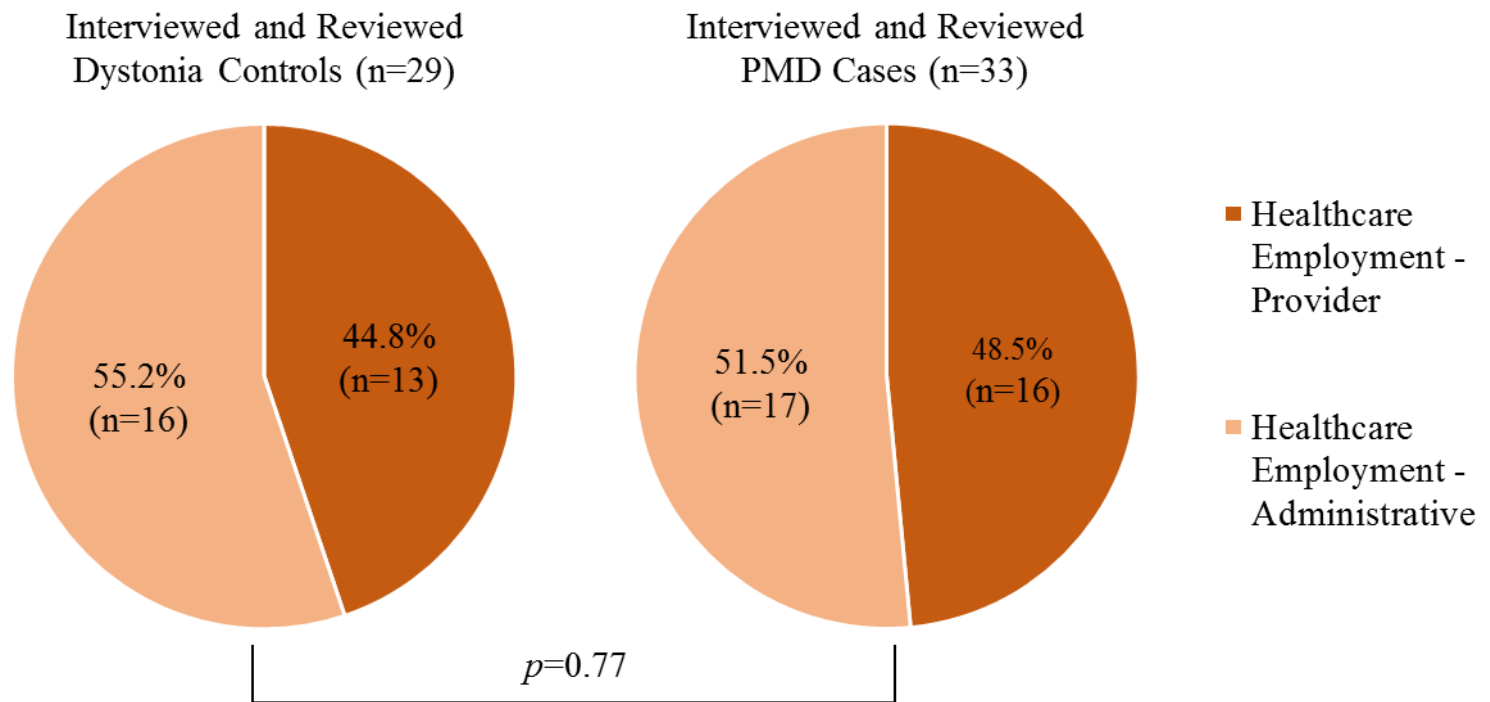

**Figure S2. Distribution of healthcare workers, subdivided into provider and administrative roles, amongst interviewed and reviewed dystonia controls and psychogenic movement disorder (PMD) cases. ( $X^2_{(df=1, n=62)}=0.08, p=0.77$ )**
