# Supplementary material
Source: PubMed Central journal article supplement (PMC6353431)
Supplement: MDC3-4-62-s003.pdf [file MDC3-4-62-s003.pdf]

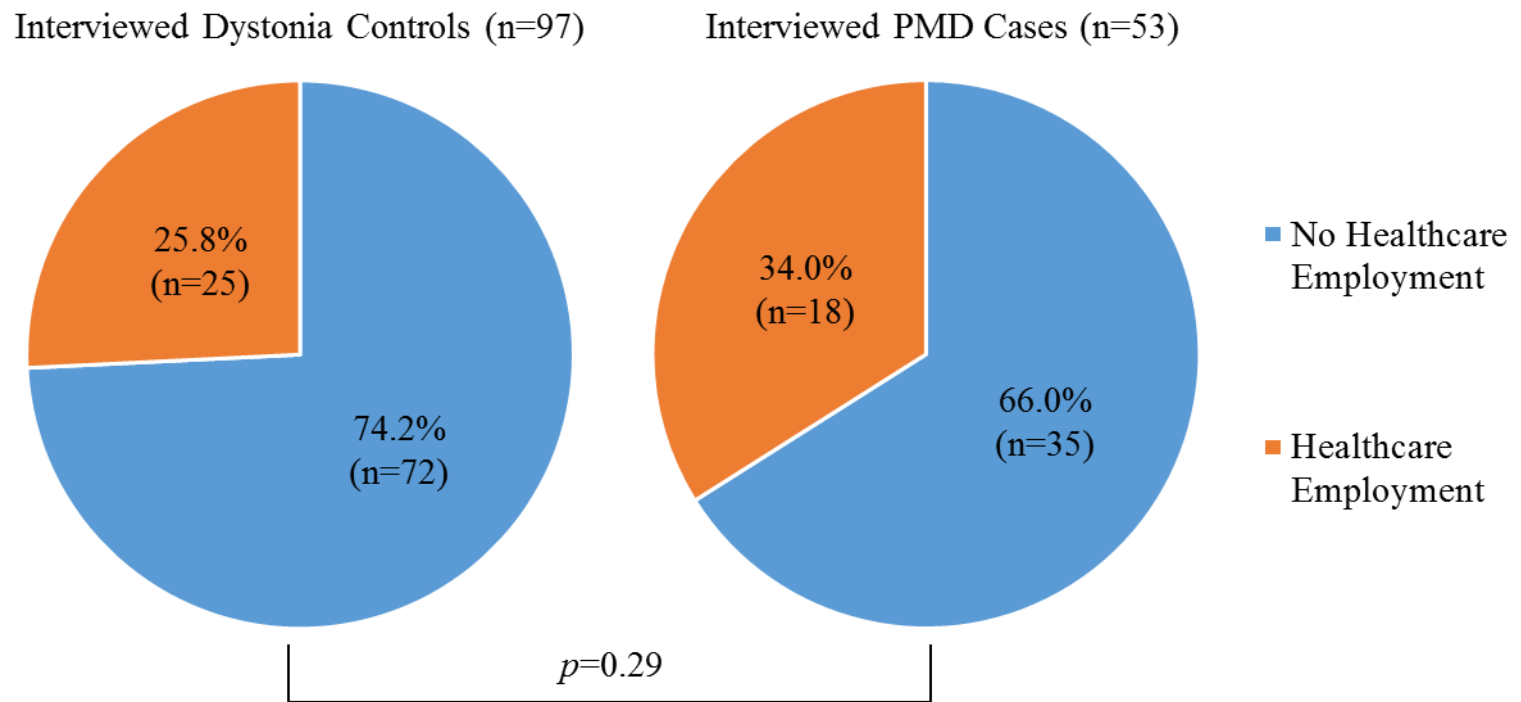

**Figure S3. Distribution of healthcare and non-healthcare workers amongst interviewed dystonia controls and psychogenic movement disorder (PMD) cases.** ( $X^2_{(df=1, n=150)}=1.12, p=0.29$ ).
