# Supplementary material
Source: PubMed Central journal article supplement (PMC6353431)
Supplement: MDC3-4-62-s004.pdf [file MDC3-4-62-s004.pdf]

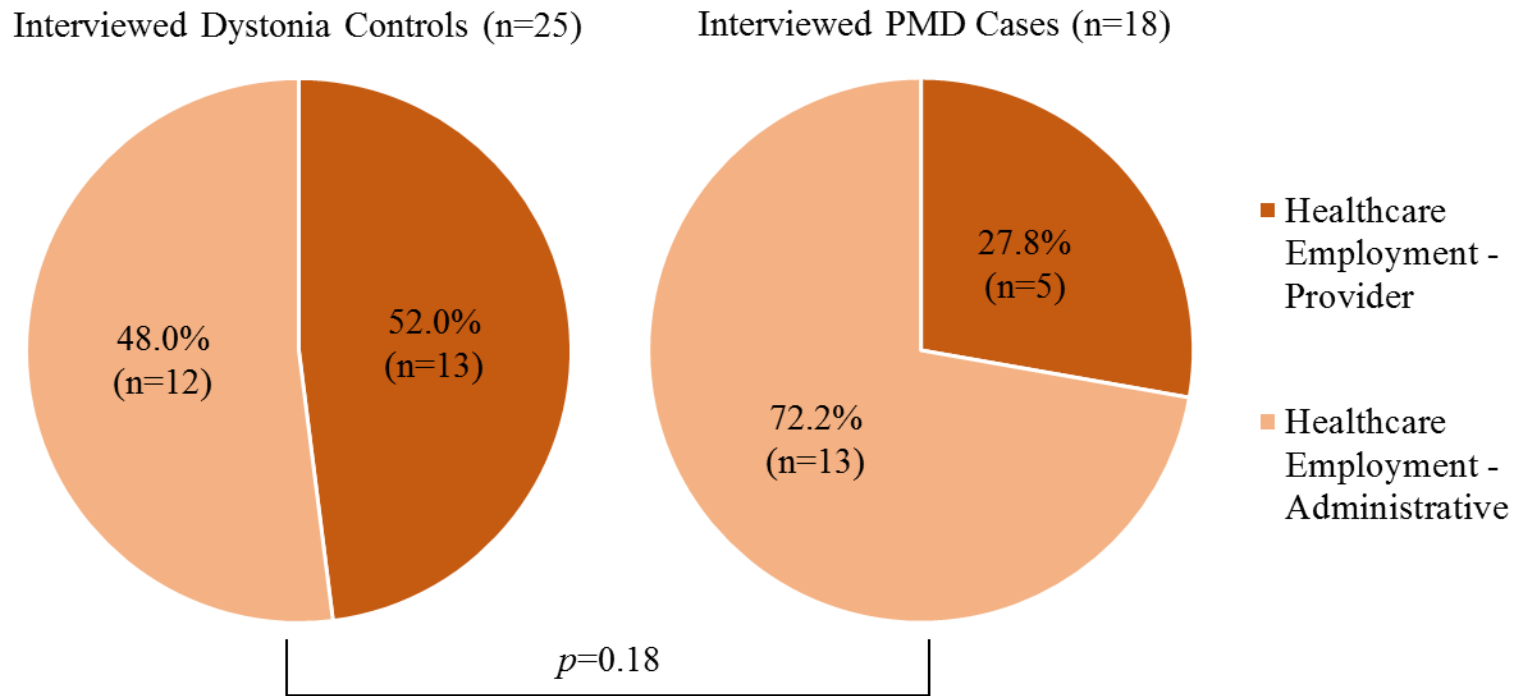

**Figure S4. Distribution of healthcare workers, subdivided into provider and administrative roles, amongst interviewed dystonia controls and psychogenic movement disorder (PMD) cases. ( $X^2_{(df=1, n=43)}=1.79, p=0.18$ )**
