# Supplementary material
Source: PubMed Central journal article supplement (PMC6353431)
Supplement: MDC3-4-62-s005.pdf [file MDC3-4-62-s005.pdf]

**Table S1. Distribution of healthcare workers amongst interviewed and reviewed psychogenic movement disorder (PMD) cases within each PMD subtype, compared to the distribution of healthcare workers amongst interviewed and reviewed controls (n=29, 20% Healthcare employment; n=119, 80% No Healthcare Employment).**

| PMD Subtype | n<br>(% of Interviewed &<br>Reviewed PMD Cases) | Healthcare<br>Employment,<br>n (row %) | No Healthcare<br>Employment,<br>n (row %) | <i>p</i> |
|-------------|-------------------------------------------------|----------------------------------------|-------------------------------------------|----------|
| Total       | 132 (100)                                       | 33 (25.0)                              | 99 (75.0)                                 | 0.28     |
| Gait        | 20 (12.6)                                       | 5 (25.0)                               | 15 (75.0)                                 | 0.57     |
| Dystonia    | 13 (8.2)                                        | 3 (23.1)                               | 10 (76.9)                                 | 0.76     |
| Myoclonus   | 23 (14.5)                                       | 6 (26.1)                               | 17 (73.9)                                 | 0.47     |
| Tremor      | 79 (49.7)                                       | 20 (25.3)                              | 59 (74.7)                                 | 0.32     |
| Other       | 24 (15.1)                                       | 7 (29.2)                               | 17 (70.8)                                 | 0.28     |
